***In-vitro* and *in-vivo* characterization of CRANAD-2 for multi-spectral optoacoustic tomography and fluorescence imaging of amyloid-beta deposits in Alzheimer mice**

Ruiqing Ni<sup>1,2,3</sup>, Alessia Villois<sup>4</sup>, Xose Luis Dean-Ben<sup>1,5</sup>, Zhenyue Chen<sup>1,5</sup>, Markus Vaas<sup>1</sup>, Stavros Stavrakis<sup>4</sup>, Gloria Shi<sup>1</sup>, Andrew deMello<sup>4</sup>, Chongzhao Ran<sup>6</sup>, Daniel Razansky<sup>1,3,5</sup>, Paolo Arosio<sup>4</sup>, Jan Klohs<sup>1,3</sup>

<sup>1</sup>Institute for Biomedical Engineering, ETH & University of Zurich, Zurich, Switzerland

<sup>2</sup>Institute for Regenerative Medicine, University of Zurich, Zurich, Switzerland

<sup>3</sup>Zurich Neuroscience Center (ZNZ), Zurich, Switzerland

<sup>4</sup>Institute for Chemical and Bioengineering, Department of Chemistry, ETH Zurich, Zurich, Switzerland

<sup>5</sup>Institute of Pharmacology and Toxicology, University of Zurich, Switzerland

<sup>6</sup>Martinos Center for Biomedical Imaging, Massachusetts General Hospital, Harvard Medical School, Charlestown, MA, U.S.A

\*Correspondence to:

Jan Klohs,

Institute for Biomedical Engineering, ETH & University of Zurich

Vladimir-Prelog-Weg 4, 8093 Zurich, Switzerland

Tel. +41 44 633 7629; Fax. +41 44 633 1187

Email: [klohs@biomed.ee.ethz.ch](mailto:klohs@biomed.ee.ethz.ch);

## Abstract

The abnormal deposition of fibrillar beta-amyloid (A $\beta$ ) deposits in the brain is one of the major histopathological hallmarks of Alzheimer's disease (AD). Here we characterize curcumin-derivative CRANAD-2 for multi-spectral optoacoustic tomography (MSOT) and fluorescence imaging of brain A $\beta$  deposits in the arcA $\beta$  mouse model of AD cerebral amyloidosis. CRANAD-2 shows a specific and quantitative detection of A $\beta$  fibrils *in vitro*, even in complex mixtures, and it is capable to distinguish between monomeric and fibrillar forms of A $\beta$ . *In vivo* epifluorescence and MSOT after intravenous CRANAD-2 administration demonstrated higher retention in arcA $\beta$  compared to non-transgenic littermate mice. Immunohistochemistry showed co-localization of CRANAD-2 and A $\beta$  deposits in arcA $\beta$  mouse brain sections, thus verifying the specificity of the probe. In conclusion, we demonstrate suitability of CRANAD-2 for fluorescence- and MSOT-based detection of A $\beta$  deposits in animal models of AD pathology, which facilitates mechanistic studies and the monitoring of putative treatments targeting A $\beta$  deposits.

**Key words:** Alzheimer's disease; amyloid-beta; animal model; fluorescence imaging; multi-spectral optoacoustic tomography;

## 1. Introduction

The abnormal accumulation and the spread of amyloid-beta ( $A\beta$ ) deposits play a central role in the pathogenesis of Alzheimer's disease (AD) and leads to downstream pathophysiological events [1, 2]. Positron emission tomography (PET) imaging of aberrant  $A\beta$  deposits has been established as a diagnostic pathological biomarker for AD under clinical setting and been included in the new diagnostic criteria [3]. Three amyloid imaging probes have been approved for clinical usage including  $^{18}\text{F}$ -florbetapir [4],  $^{18}\text{F}$ -florbetaben [5] and  $^{18}\text{F}$ -flumetamol [6]. Higher PET imaging of cortical  $A\beta$  loads were reported in the brains from patients with AD and mild cognitive impairment compared to healthy controls [7, 8]. While PET imaging in small rodents has been used for studying  $A\beta$ -related disease mechanisms and for developing therapeutic strategies [9-12], its resolution (1 mm) relative to the mouse brain dimension (10 mm  $\times$  8 mm) and the low availability of radiotracer and imaging facilities restrict its wide usage.

Optical imaging techniques such as near-infrared fluorescence (NIRF) imaging and multi-spectral optoacoustic tomography (MSOT) imaging have emerged, enabling the *in vivo* imaging of physiological, metabolic and molecular function [13-16]. This is mainly due to the fact that optical techniques have a high detection sensitivity, are cost-effective and use non-ionizing radiation. Progress is made not only in the development of optical instrumentation and reconstruction algorithms, but also in the design and synthesis of novel  $A\beta$  imaging probes [17]. For example, several probes have been reported for near-infrared fluorescence imaging including NIAD-4 [18], AOI987 [19], BODIPY [20], THK-265 [21], DANIR [22-25], curcumin-derivatives CRANAD series [26, 27], luminescent conjugated oligothiophenes [28, 29] and DBA-SLOH [30]. NIRF imaging of  $A\beta$  deposits has been shown using a variety of AD mouse models [19, 23-27, 30, 31]. Despite its advantages, the diffuse nature of light propagation in

highly scattering tissue prevents the accurate determination of probe distribution and concentration from NIRF measurements. As an inherent hybrid method, MSOT imaging capitalizes on absorption of light as a source of contrast, while emitted non-radioactive decay broadband ultrasound is used for image formation, thus combining the high sensitivity of optical imaging with the high spatial resolution of ultrasound imaging. Recently, volumetric multispectral optoacoustic tomography (vMSOT) has been introduced with added multiplexing and real-time 3D imaging capabilities, thus enabling a wide range of new biomedical applications [32-37]. Previously, intravital optoacoustic imaging of A $\beta$  deposits with intrathecal injection of Congo Red [27] and croconium-derivative [38] in amyloidosis mouse models have been reported.

In the present study, we show that CRANAD-2, previously used for NIRF imaging [26, 27], is suitable for MSOT imaging and describe its utility for *in vivo* whole brain mapping of A $\beta$  deposits in arcA $\beta$  mouse model of cerebral amyloidosis [39]. Capitalizing on the fluorescent properties we characterized binding of the probe to A $\beta$  fibrils *in vitro* using a fluorescence binding assays, *in situ* with tissue sections and immunohistochemistry and by cross-validation between MSOT and hybrid fluorescence imaging [40, 41]. Our results demonstrate suitability of CRANAD-2 for NIRF and MSOT imaging of A $\beta$  deposits.

## **2. Materials and methods**

### **2.1 Animal model**

Seven transgenic arcA $\beta$  mice overexpressing the human APP695 transgene containing the Swedish (K670N/M671L) and Arctic (E693G) mutations under the control of prion protein promoter and five age-matched non-transgenic littermates of both sexes were used (18-24

months-of-age) [39]. ArcA $\beta$  mice are characterized by a pronounced amyloid deposition, cerebral amyloid angiopathy and vascular dysfunction [36, 42-46]. Animals were housed in ventilated cages inside a temperature-controlled room, under a 12-hour dark/light cycle. Pelleted food (3437PXL15, CARGILL) and water were provided *ad-libitum*. Paper tissue and red Tecniplast mouse house® (Tecniplast, Milan, Italy) shelters were placed in cages as environmental enrichments. All experiments were performed in accordance with the Swiss Federal Act on Animal Protection and were approved by the Cantonal Veterinary Office Zurich (permit number: ZH082/18).

## 2.2 *In vitro* binding between amyloid probes and recombinant A $\beta$ <sub>1-42</sub> fibrils measured by spectrofluorometer

(T-4)-[(1E,6E)-1,7-Bis[4-(dimethylamino)phenyl]-1,6-heptadiene-3,5-dionato-kO<sub>3</sub>,kO<sub>5</sub>] difluoroboron (CRANAD-2) [26] was purchased from Sigma-Aldrich AG, Switzerland. Recombinant A $\beta$ <sub>1-42</sub> monomers were expressed and produced by *E.coli* as described previously [47]. A $\beta$ <sub>1-42</sub> fibrils were formed by incubating a solution of 2  $\mu$ M A $\beta$ <sub>1-42</sub> in phosphate buffer (20 mM sodium phosphate, 0.2 mM ethylenediaminetetraacetic acid, pH 8.0). The aggregation process was monitored by a quantitative fluorescence assay based on the Thioflavin T (ThT) dye [48]. CRANAD-2 stock was dissolved in dimethyl sulfoxide (DMSO, Sigma-Aldrich AG). The binding *in vitro* between CRANAD-2 (100 nM) or ThT (200  $\mu$ M) with A $\beta$ <sub>1-42</sub> fibrils (0 - 200 nM) was measured on a spectrofluorometer (Fluoromax-4, HORIBA Jobin Yvon Technologies, Japan) by recording the emission spectra from 660 nm - 800 nm after excitation at 640 nm or 450 nm - 650 nm respectively. To investigate whether CRANAD-2 binds selectively A $\beta$ <sub>1-42</sub> fibrils, we assessed the binding of CRANAD-2 (100 nM) and ThT (200  $\mu$ M) to other targets that are rich in

$\beta$ -sheet structures including bovine serum albumin, monoclonal antibody, and amyloids formed by lysozyme,  $\alpha$ -synuclein and insulin, all at 200 nM. Moreover, we assessed whether CRANAD-2 can distinguish between different conformations of A $\beta$  by measuring binding also to A $\beta$ <sub>1-42</sub> monomers. Finally, the specificity of CRANAD-2 for A $\beta$ <sub>1-42</sub> fibrils was further evaluated by measuring the binding between the probe and A $\beta$ <sub>1-42</sub> fibrils (0-200 nM) spiked in a cell lysate (with a total protein concentration of 7  $\mu$ M).

### 2.3 NIRF imaging

NIRF imaging were performed with the Maestro 500 multispectral imaging system (Cambridge Research & Instruments Inc.). For phantom measurements, tubes (3 mm diameter, 4 to 5 cm lengths) were filled with either 200  $\mu$ l A $\beta$  fibrils (4  $\mu$ M), or CRANAD-2 (30  $\mu$ M), or CRANAD-2(30  $\mu$ M) + A $\beta$  (4  $\mu$ M) samples.

### 2.4 MSOT

Cross-sectional MSOT imaging was performed with a commercial inVision 128 small animal scanner (iThera Medical, Germany) as described [49]. Briefly, a tunable (680-980 nm) optical parametric oscillator pumped by an Nd:YAG laser provides 9 ns excitation pulses at a framerate of 10 Hz with a wavelength tuning speed of 10 ms and a peak pulse energy of 100 mJ at 730 nm. Ten arms, each containing an optical fiber bundle, provide even illumination of a ring-shaped light strip with a width of approx. 8 mm. For ultrasound detection, 128 cylindrically focused ultrasound transducers with a center frequency of 5 MHz (60 % bandwidth), organized in a concave array of 270 degree angular coverage and a curvature radius of 4 cm, were used. Phantom and *in vivo* MSOT images were acquired at 10 wavelengths, i.e. 680, 685, 690, 695,

700, 715, 730, 760, 800 and 850 nm, coronal section, averages = 10, field-of-view =  $20 \times 20$  mm<sup>2</sup>, resolution =  $100 \mu\text{m} \times 100 \mu\text{m}$ , step = 0.3 mm moving along the axial direction.

For phantom measurements, tubes (3 mm diameter, 4 to 5 cm lengths) were filled with either 200  $\mu\text{l}$  A $\beta$  fibrils (4  $\mu\text{M}$ ), or CRANAD-2 (30  $\mu\text{M}$ ), or CRANAD-2 (30  $\mu\text{M}$ ) + A $\beta$  (4  $\mu\text{M}$ ) samples. Tubes were placed in a cylindrical phantom (2 cm diameter, 2 % agarose mixed with 5 % intralipid (Sigma-Aldrich AG, Switzerland). The phantom holder was placed in an imaging chamber filled with water and kept at 28°C.

For *in vivo* MSOT, five arcA $\beta$  mice and four non-transgenic littermates were imaged with MSOT *in vivo*. Mice underwent also magnetic resonance imaging (MRI) for co-registration with MSOT data and to facilitate volume-of-interest analysis. Mice were anesthetized with an initial dose of 4 % isoflurane (Abbott, Cham, Switzerland) in oxygen/air (200/800 mL/min) mixture and were maintained at 1.5 % isoflurane in oxygen/air (100/400 mL/min). The fur over the head was epilated. The mouse was placed in a mouse holder in prone position. The holder was inserted in an imaging chamber filled with water to keep body temperature within  $36.5 \pm 0.5$  °C. Mice were injected intravenously with CRANAD-2 (2.0 mg/kg, 15 % DMSO + 70 % PBS pH 7.4 + 15 % Kolliphor EL, Sigma-Aldrich AG) through the tail vein. Datasets were recorded before, 20, 40, 60, 90, and 120 minutes after the injection.

MSOT images were reconstructed using a model-based algorithm, size 20 mm, resolution  $100 \mu\text{m}$ , and filter range from 50 kHz to 7 MHz. The model-based reconstruction incorporates a detailed model of detection geometry that allows for more quantifiable images.

## 2.5 Hybrid vMSOT-fluorescence imaging

A hybrid vMSOT-fluorescence imaging system [32, 50] was used to assess one arcA $\beta$  mouse. A short-pulsed (<10 ns) laser was used to provide an approximately uniform illumination profile on the mouse brain surface with optical fluence <20 mJ/cm<sup>2</sup>. The excited OA responses were collected with a custom-made spherical array (Imasonic SaS, Voray, France) of 512 ultrasound detection elements with 7 MHz central frequency and > 80 % bandwidth. A custom-made optical fiber bundle (Ceramoptec GmbH, Bonn, Germany) with 4 outputs was used for guiding the laser beam from multiple angles through the lateral apertures of the array. The detected signals were digitized at 40 megasamples per second with a custom-made data acquisition system (DAQ, Falkenstein Mikrosysteme GmbH, Taufkirchen, Germany) triggered with the Q-switch output of the laser. The pulse repetition frequency of the laser was set to 100 Hz and the laser wavelength tuned between 660 and 850 nm (10 nm step) on a per pulse basis. For the concurrent 2D epifluorescence imaging [41], beam from the pulsed OPO laser was similarly used for excitation. The generated fluorescence field was collected by a fiberoptic imaging fiber bundle comprised of 100,000 fibers and then projected onto an EMCCD camera (Andor Luca R, Oxford Instruments, UK). For hybrid imaging, the fiberscope was inserted into the central aperture of the spherical array detector. The system has an overall field-of-view of 15×15×15mm<sup>3</sup> and resolution in the 110  $\mu$ m range for both vMSOT and epifluorescence measurements [32, 51]. The optoacoustic signals were recorded before injection, 20, 40, 60, 90 and 120 min after injection of CRANAD-2; fluorescence signals were recorded before injection, 22, 42, 62, 92 and 120 minutes after injection of CRANAD-2. To examine the influence of scalp on the absorbance intensity, the scalp of the mouse was then removed. The mouse head was imaged afterwards using the same setting.



For the hybrid vMSOT-fluorescence measurements, images were rendered in real-time during the acquisition via fast back-projection-based image reconstruction implemented on a graphics processing unit [52]. A 3D model-based iterative algorithm was used off-line for more accurate reconstruction [53]. Prior to reconstruction, the collected signals were band-pass filtered with cut-off frequencies of 0.1 and 9 MHz. However, acoustic distortions associated to speed of sound heterogeneities, acoustic scattering and attenuation as well as the response of the ultrasound sensing elements of the array are known to additionally play a role in the quality of the images rendered [54].

## 2.6 MRI

MRI scans were performed on a 7/16 small animal MR Pharmascan (Bruker Biospin GmbH, Ettlingen, Germany) equipped with an actively shielded gradient capable of switching 760 mT/m with an 80- $\mu$ s rise time and operated by a ParaVision 6.0 software platform (Bruker Biospin GmbH, Ettlingen, Germany). A circular polarized volume resonator was used for signal transmission, and an actively decoupled mouse brain quadrature surface coil with integrated combiner and preamplifier was used for signal receiving. Mice were anesthetized with an initial dose of 4% isoflurane (Abbott, Cham, Switzerland) in oxygen/air (200/800 mL/min) mixture and were maintained at 1.5% isoflurane in oxygen/air (100/400 mL/min). Mice were next placed in prone position on a water-heated support to keep body temperature within  $36.5^{\circ}\text{C} \pm 0.5^{\circ}\text{C}$ , monitored with a rectal temperature probe. *In vivo* T<sub>2</sub>-weighted MR images of mouse brain/head were obtained using a 2D spin echo sequence (Turbo rapid acquisition with refocused echoes) with imaging parameters: RARE factor 8, echo time 36 ms, repetition time 2628 ms, 6 averages, slice thickness 0.7 mm, no slice gap, field of view  $20 \times 20 \text{ mm}^2$ , matrix  $512 \times 512$ , giving an in-

plane spatial resolution  $39 \times 39 \mu\text{m}^2$ , out-of-plane resolution 0.7 mm (slice thickness), within a scan time 12 min 36 s.

## 2.7 Co-registration with MRI and volume-of-interest analysis of MSOT data

Registration between MSOT data and mouse brain MR images can provide a better anatomical reference for regional analysis. The cross-sectional MSOT images were co-registered with  $T_2$ -weighted MRI data as described [55]. For dynamic data, time course of regional absorbance (a.u.) at 680 nm were plotted and the area-under-curves were calculated. The retention of probe was calculated by averaging values from 60-120 min post-injection.

## 2.8 Immunohistochemistry and confocal imaging

For immunohistochemistry and confocal microscopy, mice were perfused with  $1 \times$  PBS (pH 7.4), under ketamine/xylazine/acepromazine maleate anesthesia (75/10/2 mg/kg body weight, bolus injection) and decapitated. Brains were removed from the skull afterwards, fixed in 4 % paraformaldehyde in  $1 \times$  PBS (pH 7.4). Brain tissue were cut horizontally at  $5 \mu\text{m}$  and stained with CRANAD-2, anti- $A\beta_{1-16}$  antibody 6E10 (Signet Lab, SIG-39320, 1:5000), fibrillar conformation anti-amyloid antibody OC (Merck, AB2286, 1:200), Donkey-anti-Rat Alexa 488 (Jackson, AB-2340686, 1:400), Goat-anti-Rabbit Alexa488 (Invitrogen, A11034, 1:200) and counter-stained using 4',6-diamidino-2-phenylindole (DAPI) for nuclei (Sigma, D9542-10MG, 1:1000). Confocal images of the cortex of non-transgenic littermates and arc $A\beta$  mice were obtained using a Leica SP8 confocal microscope (Leica Microsystems GmbH, Germany) at ScopeM ETH Zurich Höggerberg core facility. Sequential images were obtained by using 458 nm, 640 nm lines of the laser respectively. Identical settings were used and images were obtained

for the non-transgenic littermates and arcA $\beta$  mice at  $\times 20$  and  $\times 60$  magnification, resolution with Z stack and maximum intensity projection.

## 2.9 Statistics

Unpaired two-tail *student t* test with Welch's correction was used (Graphpad Prism 8.2, Graphpad Software Inc, USA) for comparing values between arcA $\beta$  mice and non-transgenic littermates. All data are present as mean  $\pm$  standard deviation. Significance was set at \*  $p < 0.05$ .

## 3 Results

### 3.1. *In vitro* characterization of probes on recombinant A $\beta_{1-42}$ fibrils

We performed a fluorescence binding assay to assess the specificity of CRANAD-2 to A $\beta$  fibrils (**Fig. 1**) and compare with the Thioflavin T (ThT) dye, a small molecule that gives strong fluorescence upon binding to amyloids and is currently the most common probe for *in vitro* assay of amyloid formation [56]. As expected, ThT binding to aggregated A $\beta_{1-42}$  fibrils (0-100 nM), resulting in a dose-dependent increase in fluorescence intensities at X nm (**Fig. 1a**). In comparison, upon binding to aggregated A $\beta_{1-42}$  fibrils CRANAD-2 showed an increase in fluorescence intensity at 681 nm (**Fig. 1d**). Linear relations between fluorescence intensity and concentration of aggregated A $\beta_{1-42}$  fibrils (0-100 nM) were observed with CRANAD-2 (100 nM, **Figs. 1e-f**,  $r = 0.993$ ) and ThT (200  $\mu\text{M}$ , **Figs. 1b-c**,  $r = 0.955$ ). In the presence of 200 nM A $\beta_{1-42}$  fibrils the intensity is approximately 25-fold higher for CRANAD-2 compared to ThT ( $2.01 \times 10^3$  vs  $4.99 \times 10^4$  counts per seconds).

In a second set of experiments, we assessed the binding of CRANAD-2 and ThT to other proteins, including monomeric proteins rich in  $\beta$ -sheet structures, amyloid fibrils composed of

other proteins and monomeric A $\beta$ <sub>1-42</sub> peptide. ThT showed specific binding to A $\beta$ <sub>1-42</sub> fibrils, a lower binding to  $\alpha$ -synuclein, and insulin (**Fig. 1g**).

CRANAD-2 showed higher intensity signal upon binding to A $\beta$ <sub>1-42</sub> fibrils compared to fibrils composed of  $\alpha$ -synuclein, insulin, lysosome, and to the A $\beta$ <sub>1-42</sub> monomer, while a non-negligible signal was observed in the presence of bovine serum albumin (**Fig. 1h**). Also ThT showed a higher signal upon binding to A $\beta$ <sub>1-42</sub> fibrils but compared to CRANAD-2 the intensity upon binding to fibrils of  $\alpha$ -synuclein, and insulin was higher (**Fig. 1g**). Therefore, with respect to ThT, CRANAD-2 shows more specificity to A $\beta$ <sub>1-42</sub> fibrils and less generic binding to  $\beta$ -Sheet structures.

We further investigated the specificity of CRANAD-2 (100 nM) for A $\beta$ <sub>1-42</sub> fibrils (0-200 nM) in a complex sample (cell lysate with estimated total protein concentration of 7  $\mu$ M). Notably, a linear relationship between A $\beta$ <sub>1-42</sub> fibrils and CRANAD-2 fluorescence intensity was observed even when fibrils were spiked in a cell lysate with much higher concentration of other proteins (**Fig. 1i**).

Overall, these results demonstrate that CRANAD-2 can bind A $\beta$ <sub>1-42</sub> fibrils with high affinity, specificity and selectivity. Importantly, the probe can distinguish between monomeric and fibrillar forms of the peptide.

### 3.2. *In vitro* binding of CRANAD-2 to A $\beta$ fibrils increases NIRF and OA signal

CRANAD-2 was incubated with A $\beta$  fibrils and measured in an agar phantom with NIRF imaging and MSOT (**Fig. 1**). Analysis of NIRF images of the samples indicated a 50 % increase in fluorescence intensity when CRANAD-2 was co-incubated with A $\beta$  fibrils (**Figs. 2a, b**). In

comparison, analysis of the probe phantom measured with MSOT showed a 100 % increase in the OA signal (**Figs. 2a, c**).

### 3.3. MSOT detects A $\beta$ deposits *in vivo*

CRANAD-2 has been shown to cross the blood-brain-barrier and reach the brain parenchyma [26, 27]. We explored the ability of OA imaging to detect A $\beta$  deposits *in vivo* in mouse brain. This, we set out to explore the ability of 3D whole brain A $\beta$  mapping with MSOT. We monitored CRANAD-2 uptake in arcA $\beta$  mice and non-transgenic littermates for 120 min post-injection (**Fig. 3**). The delta images in relation to the pre-injection images shows high probe uptake in the brain of arcA $\beta$  mice, mainly in the cortex (**Fig. 3a**). Analysis of the dynamics of cortical CRANAD-2 uptake allowed to discriminate arcA $\beta$  mice from non-transgenic littermates (**Fig. 3**). The signal plateaued around 90 minutes, where higher AUC was observed in the cortical region of arcA $\beta$  mice compared to non-transgenic littermates (**Fig. 3c**).

### 3.4. *In vivo* hybrid vMSOT and epifluorescence imaging in arcA $\beta$ mouse brain

We used a hybrid system to assess simultaneous vMSOT and epifluorescence imaging for CRANAD-2 distribution in arcA $\beta$  mouse brain. One arcA $\beta$  mouse was scanned *in vivo* using the hybrid system with intact scalp till 120 minutes after CRANAD-2 probe injection. A measurement was made without scalp at the end of data acquisition at 140 minutes (**Fig. 4**). We did not attain actual unmixing of CRANAD-2 (probably due to the similarity in absorbance spectrum with deoxyhemoglobin), and deoxy/oxyhemoglobin signal. The fluorescent CRANAD-2 spots are clearly visible with scalp (**Figs. 4a, b**) and without scalp (**Figs. 4a, d**). In comparison

to the fluorescence signal, the degree of changes in MSOT signal (at single 660 nm wavelength) in the arcA $\beta$  mouse brain was moderate (**Figs. 4b, e**).

### 3.5. *Ex vivo* staining on mouse brain sections

To validate the specificity of CRANDA-2 binding to A $\beta$  deposits in mouse brain, horizontal brain tissue sections from arcA $\beta$  mice and non-transgenic littermates were stained with CRANAD-2 in addition to anti-A $\beta$  antibodies 6E10, which binds any type of A $\beta$ , and OC, which recognizes mature fibrils [57], and were nuclear counterstained with DAPI (**Fig. 5**). No signal was observed in the cortex from non-transgenic littermates (**Figs. 5a, f**). CRANAD-2 clearly co-stained with OC or 6E10 stained parenchymal and vessel wall-associated A $\beta$  deposits in the arcA $\beta$  mouse brain (**Figs. 5b-e, g-n**). This suggests specific binding of CRANAD-2 to A $\beta$  deposits. We also observed auto-fluorescence (blue) of A $\beta$  plaques in the cortical region of arcA $\beta$  mouse brain tissue slice (**Fig. 5o**), similar to other reports [58].

## 4 Discussion

Developing tools for non-invasive detection of A $\beta$  deposits at high-resolution in animal models of AD is critical for investigating disease mechanism and translational development of A $\beta$ -targeted therapies. Most probes for A $\beta$  including NIAD-4 [18], AOI987 [19], BODIPY [20], THK-265 [21], DANIR [22-25], curcumin-derivatives CRANAD series [26, 27], luminescent conjugated oligothiophenes [28, 29] and DBA-SLOH [30] have been so far been designed for fluorescence imaging application. Nevertheless, A $\beta$  binding fluorescent probes with suitable absorbance spectrum can be employed for OA imaging. We took advantage of the fluorescent

property of CRANAD-2 to characterize the suitability of the probe to map cerebral A $\beta$  deposits with NIRF and OA imaging.

CRANAD-2 has an affinity to A $\beta$  aggregates of 38.7 nM [26], which is much higher than those of BODIPY, AOI-987 [19], similar to DANIR [25] and lower than NIAD-4 [18, 25]. The *in vitro* binding assay demonstrated a linear relationship between fluorescence intensity and concentration of aggregated A $\beta_{1-42}$  fibrils for CRANAD-2. This property has been reported for many A $\beta$  binding probes such as AOI987, THK-265, DANIR and croconium dye [19, 21, 25, 38] and constitutes an advantage for the detection of fluorescence in NIRF imaging. However, when applying such probes for MSOT imaging, the increase in fluorescence quantum yield upon A $\beta$  binding leads to a decrease in MSOT signal. Despite this feature, two previous studies in a transgenic mouse model of amyloidosis have reported A $\beta$  imaging with other optoacoustic imaging systems using Congo Red [27], and croconium dye [38]. We were also able to clearly detect optoacoustic signals from CRANAD-2 bound to A $\beta$  fibrils in the phantom and in arcA $\beta$  mice *in vivo*. Moreover, in the phantom the detected signal increased upon binding of CRANAD-2 to recombinant A $\beta$  fibrils, which was higher for MSOT than NIRF imaging. In addition to an increase in fluorescence intensity, we observed a slight red-shift by 75 nm in fluorescence spectrum upon binding to aggregated A $\beta_{1-42}$  fibrils as described in previous reports [26]. Importantly, the probe exhibits little binding to other proteins involved with A $\beta$  plaque formation such as lysozyme [59]. Though, we observed a percentage of binding to bovine serum albumin that is a plasma protein in the circulation and found in A $\beta$  plaques. This is a common phenomenon of A $\beta$  binding probes such as BTA-1, PIB, florbetaben, florbetapir etc [60-62]. Co-staining of CRANAD-2 to brain sections from arcA $\beta$  mice with 6E10/OC antibodies of A $\beta$  deposition clearly showed close resemblance in both vascular and parenchymal A $\beta$  deposits.

Given the specificity of CRANAD-2 for A $\beta$  deposits and the fact that the probe generates a detectable MSOT signal upon A $\beta$  fibril binding, we explored the capability of *in vivo* MSOT cerebral A $\beta$  mapping. Probes for MSOT imaging ideally have an absorbance and emission peak at NIR or even NIR II range to allow for sufficient penetration depth and separation from deoxygenated and oxygenated hemoglobin which are abundant in biological tissue but which have lower absorption in the NIR region of light [16]. This has been considered in the design of most A $\beta$  probes, apart from NIAD-4 and Congo Red which have absorption peaks in the red part of the spectrum and which require invasive imaging approaches [18]. Moreover, some probes, e.g. BODIPY [20] derivatives and Congo red [27], do not pass across the blood-brain barrier and thus have to be injected intrathecally. CRANAD-2 has a suitable spectrum (excitation 640 nm, emission 685 nm) [26]. In previous reports it was shown that CRANAD-2 passes the blood-brain barrier [26, 27]. This has motivated us to inject the probe in arcA $\beta$  mice, which shows parenchymal plaque and cerebral amyloid angiopathy accumulation concomitantly with cognitive impairments from 6 months-of-age, where A $\beta$  plaque load increases with age [39].

The optical absorption and fluorescence contrast provided by CRANAD-2 allowed for cross-validation by simultaneous real-time recording of hybrid 3D vMSOT and 2D epifluorescence data [50], useful to understand the relation between the fluorescence, absorbance and spectral dependence of the signals generated from probe binding to targets [63]. We observed uptake and wash-out of probe with MSOT and epifluorescence imaging, though the degree of changes in MSOT signal was lower. The differences may be explained by the fact that epifluorescence lacks the depth resolving capacity thus effectively adds up signals originating from different cranial compartments (skull and scalp over the head) to provide a surface-weighted signal [64], while tomographic MSOT imaging allows to map the probe uptake in the



brain more accurately in 3D. Thus, epifluorescence imaging merely reflects wash-out of the probe from circulation, while MSOT closer represents the actual cerebral kinetics.

To harness the full potential of volumetric imaging, we performed serial MSOT imaging in arcA $\beta$  and non-transgenic littermates. Co-registration of MSOT data with a T<sub>2</sub>-weighted structural MRI dataset [37, 55] allowed to quantify regional probe uptake. We observed a clear difference in brain accumulation of CRANAD-2. In our study, the cortical signals detected by using epifluorescence imaging and vMSOT in arcA $\beta$  mice in this study was in accordance with the known A $\beta$  distribution, which is highest in dorsal areas like the cortex and decreases ventrally [36, 39, 42], and the validation from immunohistochemistry. Several factors influence the image quality of MSOT, such as the modeling accuracy of light propagation in living tissues [65]. Further application of regional based fluence correction and non-negative correction in the reconstruction and unmixing steps will enable more accurate quantification [66, 67].

In conclusion, we demonstrated the suitability of CRANAD-2 for detecting A $\beta$  deposits in a mouse model of AD amyloidosis with epifluorescence and MSOT imaging. The approach offers further longitudinal monitoring of therapeutics effect targeting at A $\beta$  and for unveiling the disease mechanism in animal models.

### **Availability of data and material**

The datasets generated and/or analyzed during the current study are available in the repository DOI zenodo: 10.5281/zenodo.3672403.

### **Author Contributions**

RN, AV, PA and JK conceived and designed the study; RN, AV, XD, ZC performed the experiments; RN, AV, XD, ZC, PA analyzed the data; RN, AV, XD, ZC, PA, JK interpreted the results; RN, AV and JK wrote the initial paper draft; all coauthors contributed constructively to writing and editing the manuscript.

### **Acknowledgement**

The authors acknowledge support from Mr Michael Reiss, Ms Marie Rouault at Institute for Biomedical Engineering, ETH & University of Zurich; Mr. Daniel Schuppli at Institute for Regenerative Medicine, University of Zurich; Dr. Joachim Hehl of the Scientific Center for Optical and Electron Microscopy (ScopeM) of the Swiss Federal Institute of Technology ETH Zurich.

### **Funding**

JK received funding from the Swiss National Science Foundation (320030\_179277), in the framework of ERA-NET NEURON (32NE30\_173678/1), Vontobel foundation, Olga Mayenfisch Stiftung, and the Synapsis foundation. RN received funding from the University of Zurich Forschungskredit (Nr. FK-17-052), and Synapsis foundation career development award (2017 CDA-03), Helmut Horten Stiftung and Jubiläumstiftung von Swiss Life. PA acknowledges financial support from the Synapsis foundation. Funding from the European Research Council (grant number ERC-CoG-2015-682379 to DR) is also acknowledged.

## References

- [1] J. Hardy, D.J. Selkoe, The amyloid hypothesis of Alzheimer's disease: progress and problems on the road to therapeutics, *Science* 297(5580) (2002) 353-6.
- [2] R. Riek, D.S. Eisenberg, The activities of amyloids from a structural perspective, *Nature* 539(7628) (2016) 227-235.
- [3] C.R. Jack, Jr., D.A. Bennett, K. Blennow, M.C. Carrillo, B. Dunn, S.B. Haeberlein, D.M. Holtzman, W. Jagust, F. Jessen, J. Karlawish, E. Liu, J.L. Molinuevo, T. Montine, C. Phelps, K.P. Rankin, C.C. Rowe, P. Scheltens, E. Siemers, H.M. Snyder, R. Sperling, NIA-AA Research Framework: Toward a biological definition of Alzheimer's disease, *Alzheimer's & dementia* 14(4) (2018) 535-562.
- [4] C.M. Clark, J.A. Schneider, B.J. Bedell, T.G. Beach, W.B. Bilker, M.A. Mintun, M.J. Pontecorvo, F. Hefti, A.P. Carpenter, M.L. Flitter, M.J. Krautkramer, H.F. Kung, R.E. Coleman, P.M. Doraiswamy, A.S. Fleisher, M.N. Sabbagh, C.H. Sadowsky, E.P. Reiman, S.P. Zehntner, D.M. Skovronsky, Use of florbetapir-PET for imaging beta-amyloid pathology, *JAMA* 305(3) (2011) 275-83.
- [5] O. Sabri, M.N. Sabbagh, J. Seibyl, H. Barthel, H. Akatsu, Y. Ouchi, K. Senda, S. Murayama, K. Ishii, M. Takao, T.G. Beach, C.C. Rowe, J.B. Leverenz, B. Ghetti, J.W. Ironside, A.M. Catafau, A.W. Stephens, A. Mueller, N. Koglin, A. Hoffmann, K. Roth, C. Reininger, W.J. Schulz-Schaeffer, G. Florbetaben Phase 3 Study, Florbetaben PET imaging to detect amyloid beta plaques in Alzheimer's disease: phase 3 study, *Alzheimer's & dementia* 11(8) (2015) 964-74.

- [6] C. Curtis, J.E. Gamez, U. Singh, C.H. Sadowsky, T. Villena, M.N. Sabbagh, T.G. Beach, R. Duara, A.S. Fleisher, K.A. Frey, Z. Walker, A. Hunjan, C. Holmes, Y.M. Escovar, C.X. Vera, M.E. Agronin, J. Ross, A. Bozoki, M. Akinola, J. Shi, R. Vandenberghe, M.D. Ikonovic, P.F. Sherwin, I.D. Grachev, G. Farrar, A.P. Smith, C.J. Buckley, R. McLain, S. Salloway, Phase 3 trial of flutemetamol labeled with radioactive fluorine 18 imaging and neuritic plaque density, *JAMA Neurol* 72(3) (2015) 287-94.
- [7] V.L. Villemagne, V. Dore, S.C. Burnham, C.L. Masters, C.C. Rowe, Imaging tau and amyloid-beta proteinopathies in Alzheimer disease and other conditions, *Nat Rev Neurol* 14(4) (2018) 225-236.
- [8] W.E. Klunk, H. Engler, A. Nordberg, Y. Wang, G. Blomqvist, D.P. Holt, M. Bergstrom, I. Savitcheva, G.F. Huang, S. Estrada, B. Ausen, M.L. Debnath, J. Barletta, J.C. Price, J. Sandell, B.J. Lopresti, A. Wall, P. Koivisto, G. Antoni, C.A. Mathis, B. Langstrom, Imaging brain amyloid in Alzheimer's disease with Pittsburgh Compound-B, *Annals Neurol* 55(3) (2004) 306-19.
- [9] E. Rodriguez-Vieitez, R. Ni, B. Gulyas, M. Toth, J. Haggkvist, C. Halldin, L. Voytenko, A. Marutle, A. Nordberg, Astrocytosis precedes amyloid plaque deposition in Alzheimer APPswe transgenic mouse brain: a correlative positron emission tomography and in vitro imaging study, *Eur J Nucl Med Mol Imag* 42(7) (2015) 1119-32
- [10] A. Rominger, M. Brendel, S. Burgold, K. Keppler, K. Baumann, G. Xiong, E. Mille, F.J. Gildehaus, J. Carlsen, J. Schlichtiger, S. Niedermoser, B. Wangler, P. Cumming, H. Steiner, J. Herms, C. Haass, P. Bartenstein, Longitudinal Assessment of Cerebral beta-Amyloid Deposition in Mice Overexpressing Swedish Mutant beta-Amyloid Precursor Protein Using 18F-Florbetaben PET, *J Nucl Med* 54(7) (2013) 1127-34.
- [11] D. Sehlin, X.T. Fang, L. Cato, G. Antoni, L. Lannfelt, S. Syvanen, Antibody-based PET imaging of amyloid beta in mouse models of Alzheimer's disease, *Nat commun* 7 (2016) 10759.
- [12] F.C. Maier, H.F. Wehrl, A.M. Schmid, J.G. Mannheim, S. Wiehr, C. Lerdkrai, C. Calaminus, A. Stahlschmidt, L. Ye, M. Burnet, D. Stiller, O. Sabri, G. Reischl, M. Staufenbiel, O. Garaschuk, M. Jucker, B.J. Pichler, Longitudinal PET-MRI reveals beta-amyloid deposition and rCBF dynamics and connects vascular amyloidosis to quantitative loss of perfusion, *Nat Med* 20(12) (2014) 1485-92.

- [13] E. Brown, J. Brunker, S.E. Bohndiek, Photoacoustic imaging as a tool to probe the tumour microenvironment, *Dis. Model. Mech.* 12(7) (2019).
- [14] X.L. Deán-Ben, S. Gottschalk, B. Mc Larney, S. Shoham, D. Razansky, Advanced optoacoustic methods for multiscale imaging of in vivo dynamics, *Chem Soc Rev* 46(8) (2017) 2158-2198.
- [15] S.V. Ovsepián, I. Olefir, G. Westmeyer, D. Razansky, V. Ntziachristos, Pushing the Boundaries of Neuroimaging with Optoacoustics, *Neuron* 96(5) (2017) 966-988.
- [16] J. Klohs, A. Wunder, K. Licha, Near-infrared fluorescent probes for imaging vascular pathophysiology, *Basic Res. Cardiol.* 103(2) (2008) 144-51.
- [17] K.J. Cao, J. Yang, Translational opportunities for amyloid-targeting fluorophores, *Chem Commun (Camb)* 54(66) (2018) 9107-9118.
- [18] E.E. Nesterov, J. Skoch, B.T. Hyman, W.E. Klunk, B.J. Bacskai, T.M. Swager, In vivo optical imaging of amyloid aggregates in brain: design of fluorescent markers, *Angew Chem Int Ed Engl* 44(34) (2005) 5452-6.
- [19] M. Hintersteiner, A. Enz, P. Frey, A.L. Jatón, W. Kinzy, R. Kneuer, U. Neumann, M. Rudin, M. Staufenbiel, M. Stoeckli, K.H. Wiederhold, H.U. Gremlich, In vivo detection of amyloid-beta deposits by near-infrared imaging using an oxazine-derivative probe, *Nat Biotechnol* 23(5) (2005) 577-83.
- [20] M. Ono, H. Watanabe, H. Kimura, H. Saji, BODIPY-based molecular probe for imaging of cerebral  $\beta$ -amyloid plaques, *ACS Chem. Neurosci.* 3(4) (2012) 319-324.
- [21] N. Okamura, M. Mori, S. Furumoto, T. Yoshikawa, R. Harada, S. Ito, Y. Fujikawa, H. Arai, K. Yanai, Y. Kudo, In vivo detection of amyloid plaques in the mouse brain using the near-infrared fluorescence probe THK-265, *Journal of Alzheimer's disease : JAD* 23(1) (2011) 37-48.
- [22] C. Ran, W. Zhao, R.D. Moir, A. Moore, Non-conjugated small molecule FRET for differentiating monomers from higher molecular weight amyloid beta species, *PloS one* 6(4) (2011) e19362.
- [23] J. Yang, X. Zhang, P. Yuan, J. Yang, Y. Xu, J. Grutzendler, Y. Shao, A. Moore, C. Ran, Oxalate-curcumin-based probe for micro- and macroimaging of reactive oxygen species in Alzheimer's disease, *Proc Natl Acad Sci U S A* 114(47) (2017) 12384-12389.
- [24] X. Zhang, Y. Tian, Z. Li, X. Tian, H. Sun, H. Liu, A. Moore, C. Ran, Design and synthesis of curcumin analogues for in vivo fluorescence imaging and inhibiting copper-induced cross-

linking of amyloid beta species in Alzheimer's disease, *J Am Chem Soc* 135(44) (2013) 16397-409.

[25] M. Cui, M. Ono, H. Watanabe, H. Kimura, B. Liu, H. Saji, Smart near-infrared fluorescence probes with donor-acceptor structure for in vivo detection of  $\beta$ -amyloid deposits, *J Am Chem Soc* 136(9) (2014) 3388-94.

[26] C. Ran, X. Xu, S.B. Raymond, B.J. Ferrara, K. Neal, B.J. Bacskai, Z. Medarova, A. Moore, Design, synthesis, and testing of difluoroboron-derivatized curcumins as near-infrared probes for in vivo detection of amyloid-beta deposits, *J Am Chem Soc* 131(42) (2009) 15257-61.

[27] X. Zhang, Y. Tian, C. Zhang, X. Tian, A.W. Ross, R.D. Moir, H. Sun, R.E. Tanzi, A. Moore, C. Ran, Near-infrared fluorescence molecular imaging of amyloid beta species and monitoring therapy in animal models of Alzheimer's disease, *Proc Natl Acad Sci U S A* 112(31) (2015) 9734-9.

[28] A. Aslund, C.J. Sigurdson, T. Klingstedt, S. Grathwohl, T. Bolmont, D.L. Dickstein, E. Glimsdal, S. Prokop, M. Lindgren, P. Konradsson, D.M. Holtzman, P.R. Hof, F.L. Heppner, S. Gandy, M. Jucker, A. Aguzzi, P. Hammarström, K.P. Nilsson, Novel pentameric thiophene derivatives for in vitro and in vivo optical imaging of a plethora of protein aggregates in cerebral amyloidoses, *ACS chemical biology* 4(8) (2009) 673-84.

[29] R. Ni, Z. Chen, G. Shi, A. Villos, Q. Zhou, P. Arosio, R.M. Nitsch, P.R. Nilsson, J. Klohs, D. Razansky, Transcranial in vivo detection of A $\beta$  at single plaque resolution with large-field multifocal illumination fluorescence microscopy, *bioRxiv* (2020) 2020.02.01.929844.

[30] Y. Li, D. Xu, S.L. Ho, H.W. Li, R. Yang, M.S. Wong, A theranostic agent for in vivo near-infrared imaging of  $\beta$ -amyloid species and inhibition of  $\beta$ -amyloid aggregation, *Biomaterials* 94 (2016) 84-92.

[31] D. Hyde, R. de Kleine, S.A. MacLaurin, E. Miller, D.H. Brooks, T. Krucker, V. Ntziachristos, Hybrid FMT-CT imaging of amyloid-beta plaques in a murine Alzheimer's disease model, *NeuroImage* 44(4) (2009) 1304-11.

[32] X.L. Dean-Ben, G. Sela, A. Lauri, M. Kneipp, V. Ntziachristos, G.G. Westmeyer, S. Shoham, D. Razansky, Functional optoacoustic neuro-tomography for scalable whole-brain monitoring of calcium indicators, *Light Sci Appl* 5(12) (2016) e16201.

[33] L.V. Wang, J. Yao, A practical guide to photoacoustic tomography in the life sciences, *Nat Methods* 13(8) (2016) 627-38.

- [34] D. Razansky, A. Buehler, V. Ntziachristos, Volumetric real-time multispectral optoacoustic tomography of biomarkers, *Nat Protoc* 6(8) (2011) 1121-9.
- [35] I. Olefir, A. Ghazaryan, H. Yang, J. Malekzadeh-Najafabadi, S. Glasl, P. Symvoulidis, V.B. O'Leary, G. Sergiadis, V. Ntziachristos, S.V. Ovsepian, Spatial and Spectral Mapping and Decomposition of Neural Dynamics and Organization of the Mouse Brain with Multispectral Optoacoustic Tomography, *Cell Rep* 26(10) (2019) 2833-2846.e3.
- [36] R. Ni, M. Rudin, J. Klohs, Cortical hypoperfusion and reduced cerebral metabolic rate of oxygen in the arcAbeta mouse model of Alzheimer's disease, *Photoacoustics* 10 (2018) 38-47.
- [37] R. Ni, M. Vaas, W. Ren, J. Klohs, Non-invasive detection of acute cerebral hypoxia and subsequent matrix-metalloproteinase activity in a mouse model of cerebral ischemia using multispectral-optoacoustic-tomography., *Neurophotonics* 5(1) (2018) 015005.
- [38] Y. Liu, Y. Yang, M. Sun, M. Cui, Y. Fu, Y. Lin, Z. Li, L. Nie, Highly specific noninvasive photoacoustic and positron emission tomography of brain plaque with functionalized croconium dye labeled by a radiotracer †Electronic supplementary information (ESI) available. See DOI: 10.1039/c6sc04798j Click here for additional data file, *Chem Sci* 8(4) (2017) 2710-2716.
- [39] M. Knobloch, U. Konietzko, D.C. Krebs, R.M. Nitsch, Intracellular Abeta and cognitive deficits precede beta-amyloid deposition in transgenic arcAbeta mice, *Neurobiol Aging* 28(9) (2007) 1297-306.
- [40] Z. Chen, X.L. Dean-Ben, S. Gottschalk, D. Razansky, Performance of optoacoustic and fluorescence imaging in detecting deep-seated fluorescent agents, *Biomed Opt Express* 9(5) (2018) 2229-2239.
- [41] Z. Chen, X.L. Dean-Ben, S. Gottschalk, D. Razansky, Hybrid system for in vivo epifluorescence and 4D optoacoustic imaging, *Opt Lett* 42(22) (2017) 4577-4580.
- [42] J. Klohs, I.W. Politano, A. Deistung, J. Grandjean, A. Drewek, M. Dominietto, R. Keist, F. Schweser, J.R. Reichenbach, R.M. Nitsch, I. Knuesel, M. Rudin, Longitudinal Assessment of Amyloid Pathology in Transgenic ArcAbeta Mice Using Multi-Parametric Magnetic Resonance Imaging, *PloS one* 8(6) (2013) e66097.
- [43] J. Klohs, A. Deistung, G.D. Ielacqua, A. Seuwen, D. Kindler, F. Schweser, M. Vaas, A. Kipar, J.R. Reichenbach, M. Rudin, Quantitative assessment of microvasculopathy in arcAbeta mice with USPIO-enhanced gradient echo MRI, *J Cereb Blood Flow Metab* 36(9) (2016) 1614-24.

- [44] R. Ni, D.R. Kindler, R. Waag, M. Rouault, P. Ravikumar, R. Nitsch, M. Rudin, G.G. Camici, L. Liberale, L. Kulic, J. Klohs, fMRI Reveals Mitigation of Cerebrovascular Dysfunction by Bradykinin Receptors 1 and 2 Inhibitor Noscipine in a Mouse Model of Cerebral Amyloidosis, *Front aging neurosci* 11 (2019) 27-27.
- [45] J. Klohs, A. Deistung, G. Ielacqua, A. Seuwen, D. Kindler, F. Schweser, M. Vaas, A. Kipar, J. Reichenbach, M. Rudin, Quantitative assessment of microvasculopathy in arcA $\beta$  mice with USPIO-enhanced gradient echo MRI, *J Cereb Blood Flow Metab* 36(9) (2016) 1614-1624.
- [46] J. Klohs, C. Baltés, F. Princz-Kranz, D. Ratering, R.M. Nitsch, I. Knuesel, M. Rudin, Contrast-enhanced magnetic resonance microangiography reveals remodeling of the cerebral microvasculature in transgenic ArcAbeta mice, *J Neurosci* 32(5) (2012) 1705-13.
- [47] P. Arosio, R. Cukalevski, B. Frohm, T.P. Knowles, S. Linse, Quantification of the concentration of A $\beta$ 42 propagons during the lag phase by an amyloid chain reaction assay, *J Am Chem Soc* 136(1) (2014) 219-25.
- [48] S.I.A. Cohen, P. Arosio, J. Presto, F.R. Kurudenkandy, H. Biverstål, L. Dolfe, C. Dunning, X. Yang, B. Frohm, M. Vendruscolo, J. Johansson, C.M. Dobson, A. Fisahn, T.P.J. Knowles, S. Linse, A molecular chaperone breaks the catalytic cycle that generates toxic A $\beta$  oligomers, *Nature Structural & Molecular Biology* 22 (2015) 207.
- [49] M. Vaas, R. Ni, M. Rudin, A. Kipar, J. Klohs, Extracerebral Tissue Damage in the Intraluminal Filament Mouse Model of Middle Cerebral Artery Occlusion, *Front Neurol* 8 (2017) 85.
- [50] Z. Chen, X.L. Deán-Ben, S. Gottschalk, D. Razansky, Hybrid system for in vivo real-time planar fluorescence and volumetric optoacoustic imaging, *SPIE2018*.
- [51] R. Ni, X.L. Dean-Ben, D. Kirschenbaum, M. Rudin, Z. Chen, A. Crimi, F. Voigt, P.R. Nilsson, F. Helmchen, R.M. Nitsch, A. Aguzzi, D. Razansky, J. Klohs, Whole brain optoacoustic tomography reveals strain-specific regional beta-amyloid densities in Alzheimer`s disease amyloidosis models, *bioRxiv* (2020) DOI: 10.1101/2020.02.25.964064.
- [52] X.L. Dean-Ben, A. Ozbek, D. Razansky, Volumetric real-time tracking of peripheral human vasculature with GPU-accelerated three-dimensional optoacoustic tomography, *IEEE Trans Med Imaging* 32(11) (2013) 2050-5.



- [53] L. Ding, X.L. Dean-Ben, D. Razansky, Efficient 3-D Model-Based Reconstruction Scheme for Arbitrary Optoacoustic Acquisition Geometries, *IEEE Trans Med Imaging* 36(9) (2017) 1858-1867.
- [54] A. Ozbek, X.L. Deán-Ben, D. Razansky, Realtime parallel back-projection algorithm for three-dimensional optoacoustic imaging devices, *SPIE2013*.
- [55] W. Ren, H. Skulason, F. Schlegel, M. Rudin, J. Klohs, R. Ni, Automated registration of magnetic resonance imaging and optoacoustic tomography data for experimental studies, *Neurophotonics* 6(2) (2019) 1-10, 10.
- [56] C. Xue, T.Y. Lin, D. Chang, Z. Guo, Thioflavin T as an amyloid dye: fibril quantification, optimal concentration and effect on aggregation, *R Soc Open Sci* 4(1) (2017) 160696.
- [57] R. Kaye, E. Head, F. Sarsoza, T. Saing, C.W. Cotman, M. Necula, L. Margol, J. Wu, L. Breydo, J.L. Thompson, S. Rasool, T. Gurlo, P. Butler, C.G. Glabe, Fibril specific, conformation dependent antibodies recognize a generic epitope common to amyloid fibrils and fibrillar oligomers that is absent in prefibrillar oligomers, *Mol Neurodegener* 2 (2007) 18.
- [58] D.R. Thal, E. Ghebremedhin, C. Haass, C. Schultz, UV light-induced autofluorescence of full-length A $\beta$ -protein deposits in the human brain, *Clin. Neuropathol.* 21(1) (2002) 35-40.
- [59] L. Helmfors, A. Boman, L. Civitelli, S. Nath, L. Sandin, C. Janefjord, H. McCann, H. Zetterberg, K. Blennow, G. Halliday, A.C. Brorsson, K. Kågedal, Protective properties of lysozyme on  $\beta$ -amyloid pathology: implications for Alzheimer disease, *Neurobiol Dis* 83 (2015) 122-33.
- [60] R. Ni, P.G. Gillberg, A. Bergfors, A. Marutle, A. Nordberg, Amyloid tracers detect multiple binding sites in Alzheimer's disease brain tissue, *Brain* 136 (2013) 2217-2227.
- [61] R. Ni, P.G. Gillberg, N. Bogdanovic, M. Viitanen, L. Myllykangas, I. Nennesmo, B. Langstrom, A. Nordberg, Amyloid tracers binding sites in autosomal dominant and sporadic Alzheimer's disease, *Alzheimer's & dementia* 13(4) (2017) 419-430.
- [62] B. Bohrmann, L. Tjernberg, P. Kuner, S. Poli, B. Levet-Trafit, J. Näslund, G. Richards, W. Huber, H. Döbeli, C. Nordstedt, Endogenous proteins controlling amyloid beta-peptide polymerization. Possible implications for beta-amyloid formation in the central nervous system and in peripheral tissues, *J Biol Chem* 274(23) (1999) 15990-5.
- [63] J.P.F. Werner, Y. Huang, K. Mishra, R. Janowski, P. Vetschera, A. Chmyrov, D. Niessing, V. Ntziachristos, A.C. Stiel, Challenging a preconception: Optoacoustic spectrum differs from

the absorption spectrum of proteins and dyes for molecular imaging, bioRxiv (2020) 2020.02.01.930230.

[64] J. Klohs, J. Steinbrink, T. Nierhaus, R. Bourayou, U. Lindauer, P. Bahmani, U. Dirnagl, A. Wunder, Noninvasive near-infrared imaging of fluorochromes within the brain of live mice: an in vivo phantom study, *Mol. Imaging* 5(3) (2006) 180-187.

[65] A. Taruttis, V. Ntziachristos, Advances in real-time multispectral optoacoustic imaging and its applications, *Nat Photon* 9(4) (2015) 219-227.

[66] X.L. Dean-Ben, J. Robin, R. Ni, D. Razansky, Noninvasive three-dimensional optoacoustic localization microangiography of deep tissues, 2020.

[67] Y. Tang, J. Yao, 3D Monte Carlo Simulation of Light Distribution in Mouse Brain in Quantitative Photoacoustic Computed Tomography, arXiv:2007.07970 (2020).

## Figure legends

### **Fig. 1 *In vitro* characterization of CRANAD-2 binding on recombinant A $\beta$ <sub>1-42</sub> fibrils. (a-f)**

Fluorescence intensity (counts per seconds, CPS) of recombinant A $\beta$ <sub>1-42</sub> fibrils (0- 200 nM) in the presence of ThT (**a**) and CRANAD-2 (**d**); Linear relation between emission peak of ThT (484 nm, **b** and zoom-in **c**) and CRANAD-2 (681 nm, **e** and zoom-in **f**) with A $\beta$ <sub>1-42</sub> fibrils concentration; Comparison of ThT (**g**) and CRANAD-2 (**h**) binding to different proteins. BSA: bovine serum albumin; mAb: monoclonal antibody; (**i**) Linear relation of the fluorescence intensity of CRANAD-2 as function of A $\beta$ <sub>1-42</sub> fibrils spike in a cell lysate;

### **Fig 2. *In vitro* fluorescence and optoacoustic imaging of CRANAD-2 and A $\beta$ fibrils. (a)**

Tubes containing CRANAD-2 (30  $\mu$ M) and CRANAD-2 (30  $\mu$ M) +A $\beta$  (4  $\mu$ M) inserts measured by using MSOT (in agar phantom) and NIRF imaging; (**b, c**) Quantification of NIRF and MSOT signal intensity. CR: CRANAD-2.

### **Fig. 3 *In vivo* optoacoustic imaging of CRANAD-2 in mouse models. (a)**

Coronal view of optoacoustic images of arcA $\beta$  mice (overlaid with T<sub>2</sub>-weighted structural MRI) at 680 nm at 10, 40, 90 and 120 min after *i.v.* tail vein injection of CRANAD-2; (**c**) Time course of MOST intensity at 680 nm in the cortex of NTL and arcA $\beta$  mice over 120 minutes; (**d**) Quantification of area-under-curve (AUC) in NTL and arcA $\beta$  mice.

### **Fig 4. *In vivo* hybrid vMSOT and epifluorescence imaging of CRANAD-2 in an arcA $\beta$**

**mouse. (a)** Epifluorescence images (horizontal); (**b**) corresponding MSOT images at 660 nm

(horizontal, sagittal and coronal views) are shown respectively; at pre-injection, 20 to 120 min post-injection of CRANAD-2; (c) Fluorescence signal as a function of time in the right and left cortex and compared to cerebellum of arcA $\beta$  mouse; (d) Fluorescence (horizontal view) and (e) MSOT signal at 660 nm (horizontal, sagittal and coronal views) when the scalp was removed at 140 min post-injection.

**Figure 5. Co-staining of CRANAD-2 with A $\beta$  deposition in non-transgenic littermate and arcA $\beta$  mouse brain tissue sections.** Sections were stained with CRANAD-2 (red) and fibrillar conformation antibody OC (green) and anti-A $\beta_{1-16}$  antibody 6E10 (green), and DAPI (blue) in the cortex of non-transgenic littermates (NTL) (a, f) and arcA $\beta$  mice (b, g); (c-e, h-j) zoom-in illustrating co-localization of the signal in (b, g); (k-n) Vessel associated cerebral amyloid angiopathy (arrowhead) and parenchymal plaque (arrow); (o) Autofluorescence of A $\beta$  plaques in the cortex of arcA $\beta$  mouse in the absence of stainings; Scale bars = 50  $\mu$ m (a, b, f, g), 20  $\mu$ m (c-e, h-o).

Figure 1

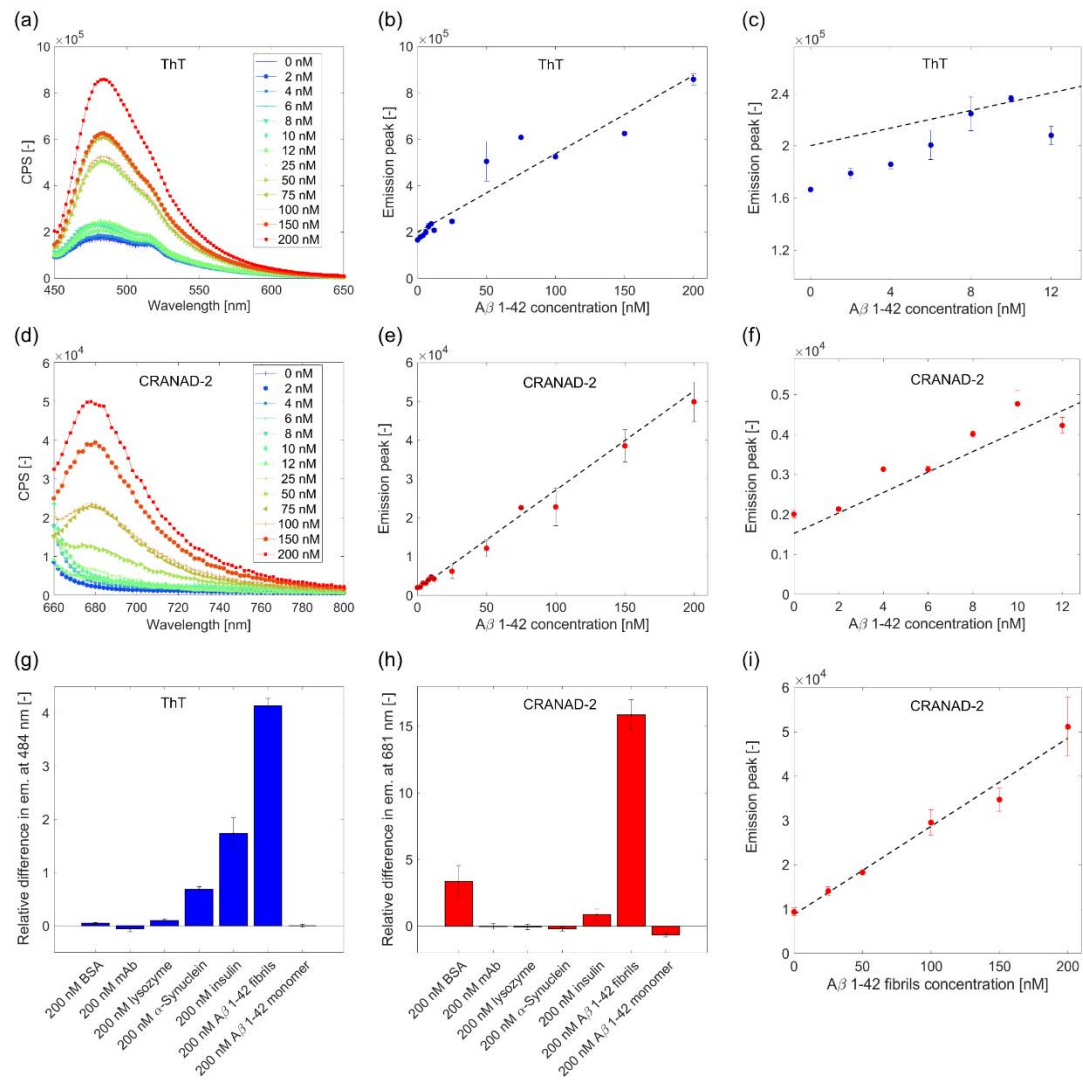

Figure 2

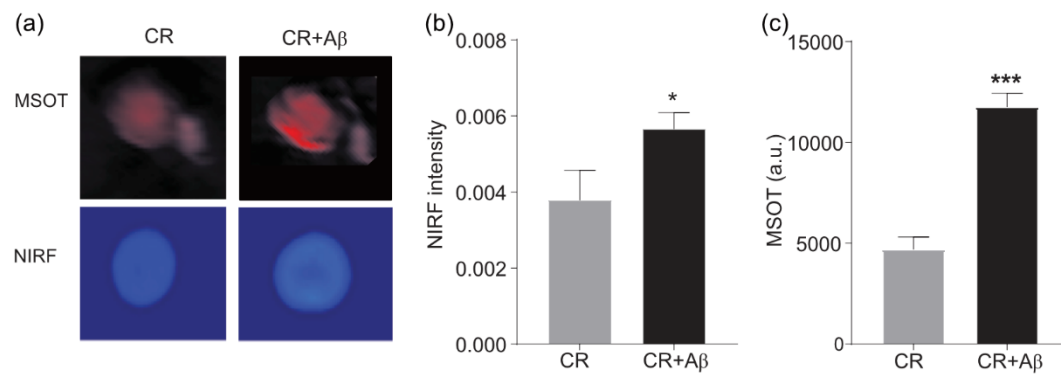

Figure 3

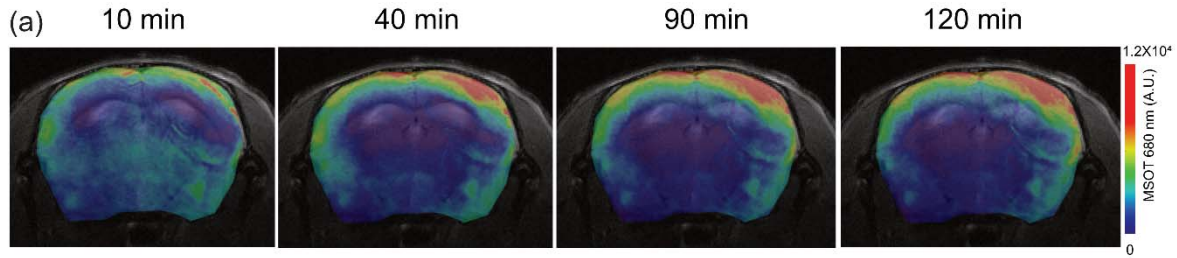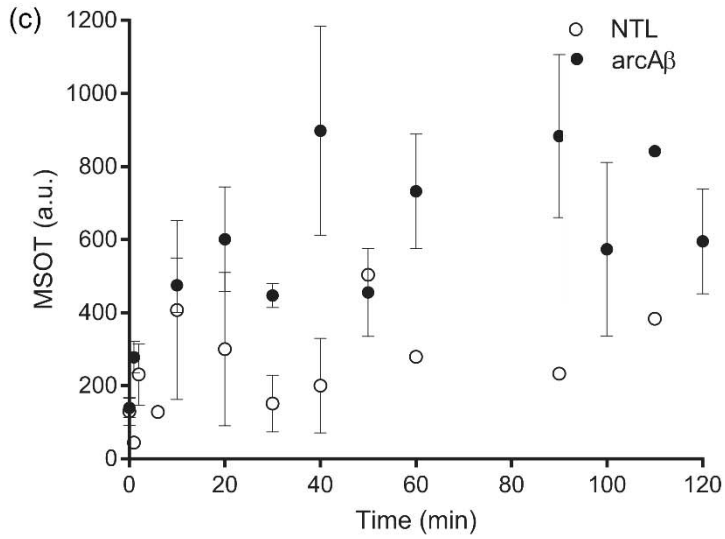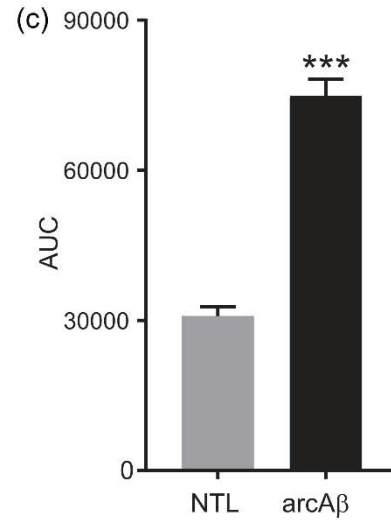

Figure 4

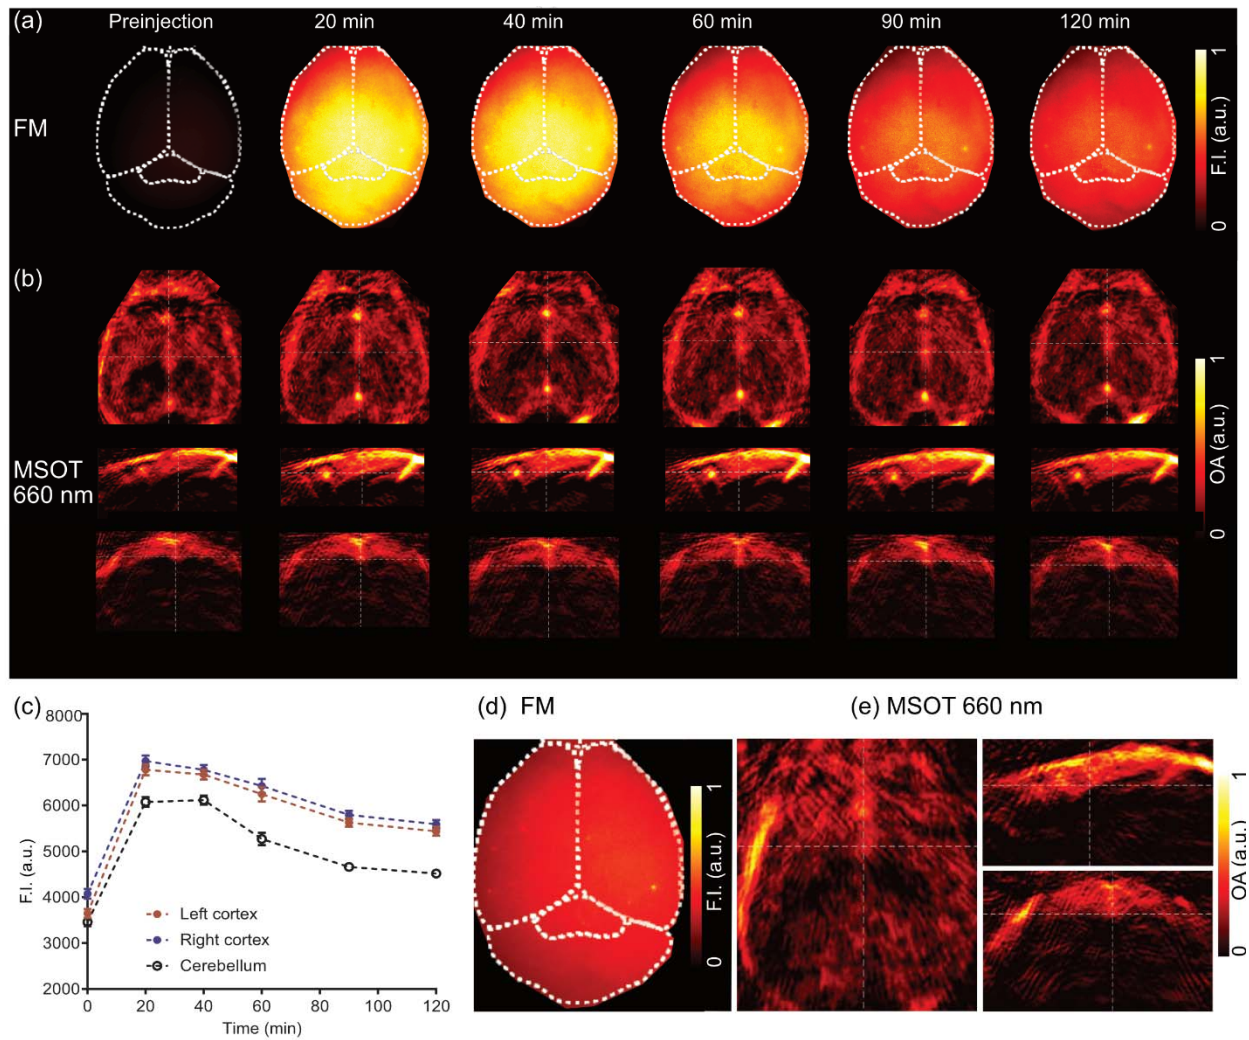



Figure 5

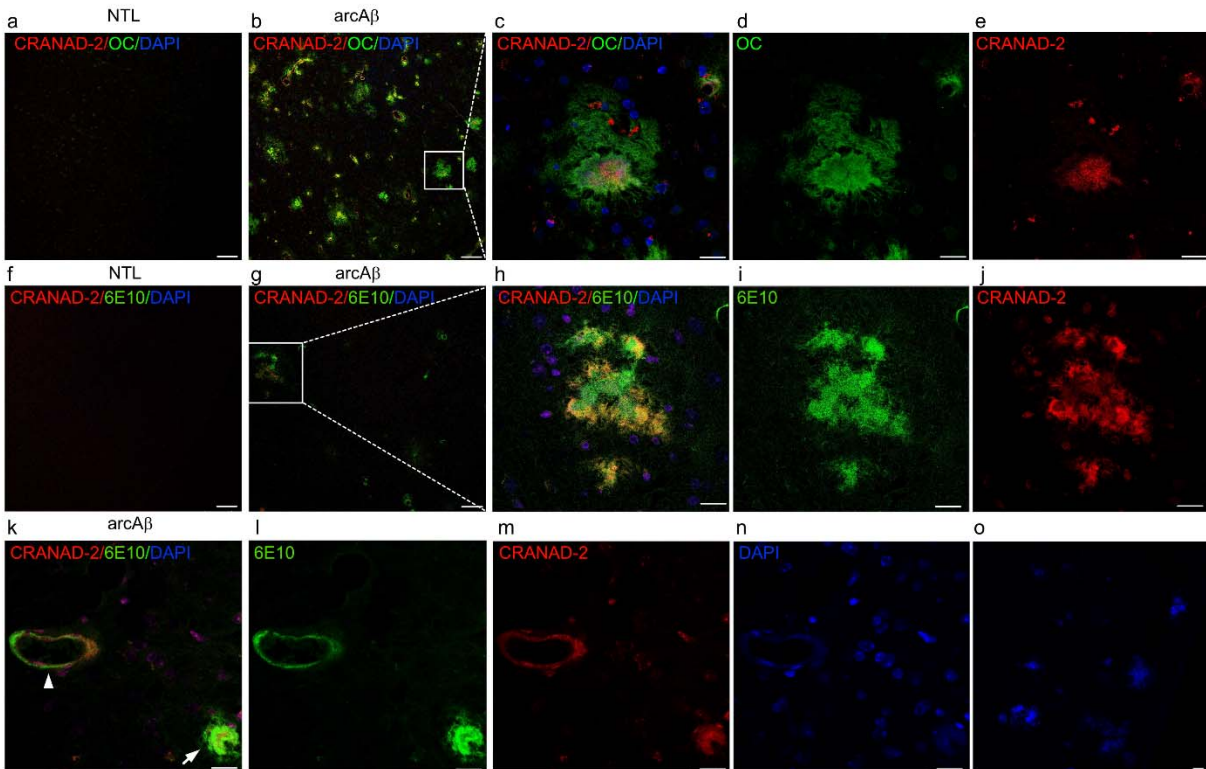

Source: http://biorxiv.org/content/10.1101/2020.10.27.353862v1.full.pdf
